# Supplementary material
Source: Springer Nature journal article supplement (https://www.springermedizin.de/resource/supplementary/12979_2013_171_MOESM4_ESM.pdf/9603150)

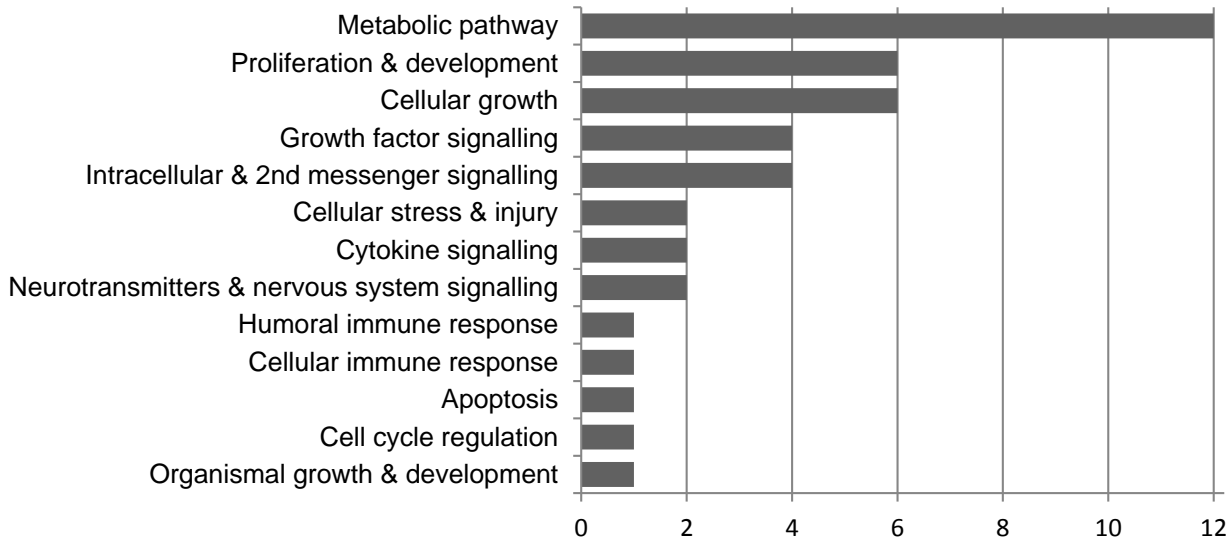

Supplement: MOESM4 [file 9603150]
